# Supplementary material for: Multi-user conflict resolution mechanisms for smart home environments
Source: PeerJ Comput Sci. 2023 Jun 23;9:e1443. doi: 10.7717/peerj-cs.1443 (PMC10319268; doi:10.7717/peerj-cs.1443)
Supplement: Supplemental Information 1 [file peerj-cs-09-1443-s001.xlsx]

## Sheet: Sheet1
	Users	Q1	Q2	Q3	Q4	Q5	Q6	Q7			Q2A	Q2M	Q2Mixed		Q1.Age	Q2.Gender	Q3.Role	Q4.Qualif	Q5.Idea	Q6.Exper	Q7.smartExpe
	1	5	6	5	6	7	7	6			2	1	3		b	b	c	b	a	b	b
	2	7	7	5	6	6	5	5			2	1	3		b	b	c	b	a	b	b
	3	7	4	5	7	6	5	5			1	3	2		b	b	c	c	a	b	b
	4	4	4	3	4	5	5	5			2	1	3		b	b	c	c	a	a	b
	5	4	3	3	4	6	5	4			2	3	3		b	b	c	b	a	b	b
	6	4	7	4	4	7	4	7			3	2	1		b	b	c	b	a	b	b
	7	4	6	7	6	5	7	7			3	2	2		b	b	c	c	a	b	b
	8	6	4	7	6	6	7	7			1	3	2		b	a	c	b	a	b	a
	9	6	4	7	6	4	6	4			3	3	2		b	b	c	c	a	a	a
	10	7	7	5	6	7	6	7			3	3	3		b	a	c	c	a	a	a
	11	7	7	1	2	1	7	2			3	3	3		b	b	c	c	a	a	a
	12	4	3	4	4	5	5	5			3	3	2		b	b	c	c	b	b	b
	13	6	4	6	5	7	7	6			1	2	3		b	a	c	c	a	a	a
	14	6	5	6	6	4	7	7			2	3	1		b	a	c	c	a	a	b
	15	5	6	6	4	5	5	6			2	1	3		b	a	c	c	a	a	a
	16	4	5	4	5	5	4	6			2	1	3		b	a	c	b	a	a	a
	17	5	6	5	5	6	5	5			1	3	2		b	b	c	c	b	a	b
	18	5	4	5	6	3	5	5			2	3	1		b	b	c	b	a	a	a
	21	7	4	7	6	5	6	7			3	3	2		b	a	c	c	a	b	b
	22	6	4	6	7	4	7	6			3	3	1		b	a	c	c	a	b	b
	26	5	5	6	6	5	7	5			1	3	2		b	a	c	b	a	a	b
	27	7	7	6	7	7	7	7			3	3	3		b	a	c	c	b	a	b
	28	6	6	7	5	6	7	7			3	2	3		b	a	c	c	a	a	a
	29	7	7	5	7	7	7	7			3	3	3		b	a	c	c	a	a	b
	30	6	4	5	6	6	7	6			3	3	2		b	a	c	c	a	b	b
	31	4	5	4	7	7	7	7			2	2	3		b	a	c	c	a	a	a
	32	7	6	7	7	6	7	7			3	2	2		b	a	c	c	a	b	a
	33	7	5	7	5	7	7	5			2	2	2		b	a	c	c	a	a	a
	34	5	6	7	7	7	7	7			3	1	3		b	a	c	c	a	b	b
	35	6	5	6	7	6	7	5			3	2	3		b	a	c	c	b	b	b
	36	4	5	7	6	3	2	7			3	2	3		b	a	c	c	a	b	b
	37	6	6	7	6	7	7	7			3	3	2		b	a	c	c	b	b	b
	38	7	5	5	7	5	6	2			3	1	2		b	a	c	c	b	b	b
	39	7	6	6	6	2	7	1			3	2	1		b	b	c	c	a	a	b
	40	7	6	7	7	5	7	7			3	1	2		b	a	c	d	a	a	a
	41	7	7	6	6	7	7	1			1	2	3		b	a	c	c	a	a	b
	42	7	6	7	7	7	7	6			3	3	3		b	a	c	c	a	a	a
	43	3	5	6	4	2	4	5			3	3	2		b	a	c	c	a	a	b
	44	7	6	7	7	6	6	7			1	3	2		b	a	c	c	a	a	a
	45	6	5	7	7	4	3	7			3	2	3		b	a	c	c	a	a	a
	46	7	6	5	6	6	7	6			3	2	1		b	a	c	c	b	b	b
	47	4	5	5	4	6	5	6			2	2	3		b	a	c	c	b	b	b
	48	7	7	7	7	7	7	2			1	2	3		b	a	c	b	a	a	b
	49	6	5	6	5	2	7	6			2	1	3		b	a	c	c	a	a	b
	50	3	5	7	5	6	7	6			3	3	2		b	a	c	c	a	a	b
	51	5	6	5	5	3	6	3			3	3	3		b	a	c	c	a	b	b
	52	6	7	6	5	5	7	7			2	1	3		b	a	c	c	b	a	b
	53	6	5	7	7	5	7	7			3	2	3		b	a	c	c	b	a	b
	54	7	6	5	7	7	7	7			3	3	3		b	a	c	c	b	b	b
	55	7	7	7	7	7	7	7			3	3	3		b	a	c	c	b	b	b
	56	5	5	7	5	5	7	7			2	2	2		b	a	c	c	b	a	b
	57	4	3	3	3	4	7	7			2	3	2		b	a	c	c	b	a	a
	58	5	7	6	7	5	7	7			3	2	2		b	a	c	b	a	b	b
	60	6	5	6	6	5	7	5			2	1	3		b	a	c	d	b	b	b
	61	4	3	5	6	4	4	3			3	2	2		b	a	c	b	a	b	b
	62	7	2	5	7	4	7	6			3	2	3		b	a	a	c	a	a	b
	63	7	7	5	7	5	7	7			3	2	3		b	a	c	c	b	a	a
	65	7	4	7	7	7	7	7			2	1	3		b	b	c	d	a	a	b
	66	6	5	5	5	6	6	4			1	3	2		b	a	c	c	b	b	b
	68	5	7	6	7	6	7	7			3	2	3		b	a	c	c	a	a	b
	69	5	5	5	6	5	4	6			3	3	2		b	a	c	c	a	b	b
	70	6	6	6	6	6	7	7			3	3	3		b	a	c	c	a	a	b
	71	7	7	7	7	7	7	7			3	3	3		b	a	c	d	a	b	b
	72	6	6	7	5	7	7	6			3	3	2		b	a	c	d	a	a	b
	73	6	6	7	6	6	6	7			2	3	1		b	b	c	d	a	a	a
	76	6	7	6	6	6	5	6			1	2	3		b	a	c	d	a	a	b
	77	7	7	7	4	6	3	7			3	2	3		b	a	c	c	b	b	a
	78	7	5	7	6	7	7	6			3	1	1		b	a	c	c	a	a	b
	79	7	7	7	6	7	6	6			3	1	2		b	a	c	c	a	a	b
	80	7	7	7	7	7	7	7			3	2	3		b	a	c	c	a	a	b
	82	7	6	7	5	5	6	7			3	3	2		b	a	c	c	a	a	b
	83	7	6	6	7	5	7	7			3	2	3		b	a	c	c	a	a	b
	84	7	7	7	6	7	5	7			3	3	2		b	a	c	c	a	a	b
		Q1	Q2	Q3	Q4	Q5	Q6	Q7			Q2A	Q2M	Q2MIXED
		30	19	29	25	22	44	35			45	33	38
		19	20	18	25	19	10	17			18	26	27
		11	19	18	13	18	11	11			10	14	8
		11	10	4	8	7	5	3
		2	4	3	1	3	2	2									%
		0	1	0	1	3	1	3			number of male user:					58	0.794521
		0	0	1	0	1	0	2			number of female user:					15	0.205479
Standard Deviation		1.1896	1.24859	1.25467	1.13861	1.44456	1.21727	1.54843					total			73		%
								5.86301			role as a father:						1	0.0136986
		Gender									rule as a mother:						0	0
		Male	0.79								role as a child:						72	0.986301
		Female	0.21	q1	5.87671								total			%	73
		Age		q2	5.50685						age range less than 18:				0	0
		Less Than 18	0	q3	5.84932						age range from 18-25:				73	1
		18 - 25	0.87	q4	5.84932						age range from 26-35:				0	0
		26 - 35	0.11	q5	5.50685						age range from 36 or above:				0	0
		36 or Above	0.02	q6	6.17808								total		73				%
		Role In The Family									high school/college degree							11	0.150685
		Father	0.04								bachlor degree:							55	0.753425
		Mather	0								master degree:							7	0.0958904
		Children	0.96								phd degree:							0	0
		Education											total					73		%
		High School College	0.13								users who have an idea about smart environment:								55	0.753425
		Bachelor	0.67								users whodont have an idea about smart environment								18	0.246575
		Masters	0.19										total						73		%
		Doctorate (PhD)	0.01								users who experience conflict at home:									44	0.60274
		Have an Idea About Smart Env									users who didnt experience conflict at home:									29	0.39726
		Yes	0.74										total							73		%
		No	0.26								users who used multi-user smart env										20	0.273973
		Experienced User Conflicts									users who didnt use multi-user smart env										53	0.726027
		Yes	0.61										total								73
		No	0.39
		Experienced Multi-User Env
		Yes	0.27
		No	0.73
